# Supplementary material for: Association of survival with adjuvant radiotherapy for pN0 esophageal cancer
Source: publisher site journal article supplement (doi:10.18632/aging.204677), 2023-04-25
Supplement: Supplementary file [file aging-v15i8-204677-supplementary-material-SD1.pdf]

## SUPPLEMENTARY FIGURES

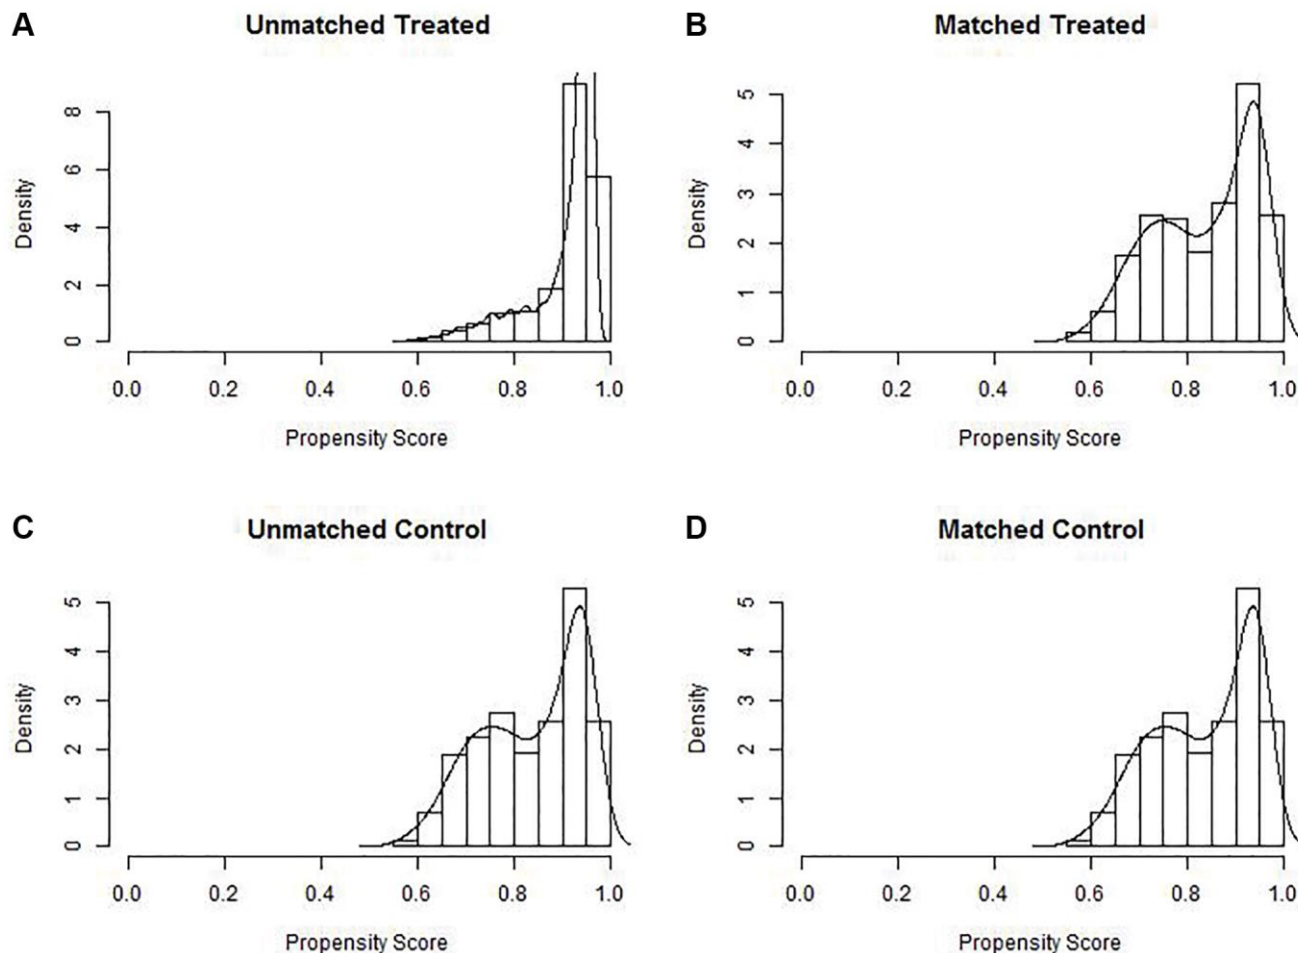

**Supplementary Figure 1. Histogram of propensity scores for patients between the surgery alone group and surgery + postop RT group. (A) Unmatched patients who received surgery alone. (B) Matched patients who received surgery alone. (C) Unmatched patients who received surgery + postop RT. (D) Matched patients who received surgery + postop RT. Matched groups have similar propensity score distributions.**

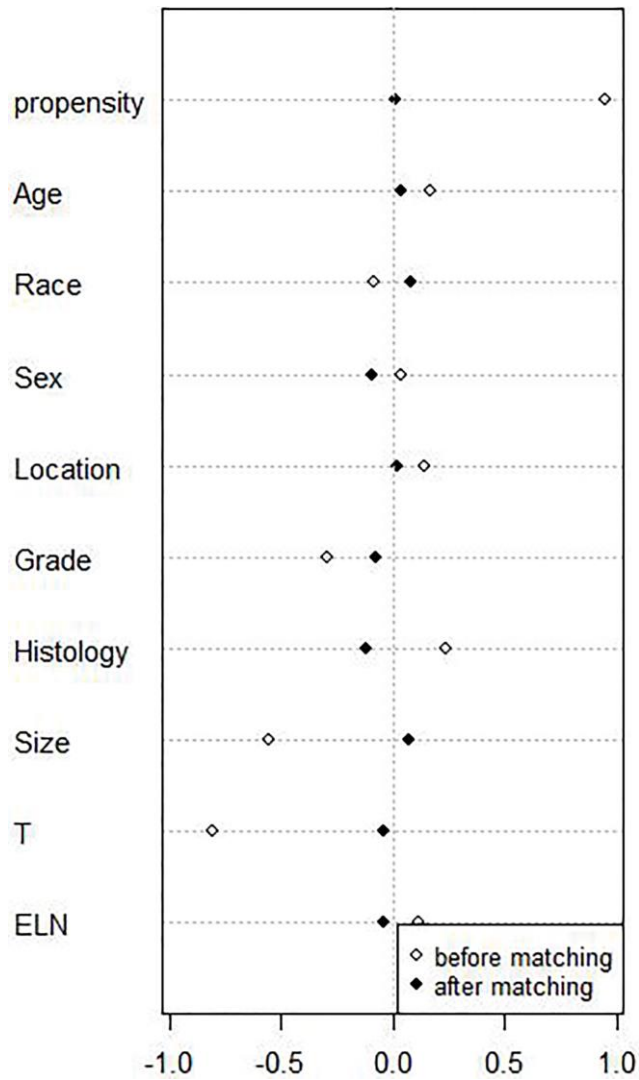

**Supplementary Figure 2. Standardized differences of variables between patients who received surgery alone and those who received surgery + postop RT.** Hollow diamond symbolized differences before propensity matching and black diamond symbolized differences after propensity matching. Propensity matching effectively reduced heterogeneity among variables between the two surgical approaches in comparison. Abbreviation: ELN: examined lymph node.
